# Supplementary material for: Quantifying environmental co-benefits of nitrogen based crop restructuring and its implication on trade network system
Source: Research Square preprint supplement (doi:10.21203/rs.3.rs-5402139/v1), 2024-12-05
Supplement: Supplementary file 1 [file 43a377d7cee738557a068e3c.pdf]

## Supplementary information

### **Supplementary Information for: Quantifying environmental co-benefits of nitrogen based crop restructuring and its implication on trade network system**

*Shekhar Sharan Goyal<sup>1</sup>, Rohini Kumar<sup>2\*</sup>, Udit Bhatia<sup>3,4\*</sup>*

<sup>1</sup>Department of Earth Sciences, Indian Institute of Technology Gandhinagar, Palaj, Gandhinagar, 382055, Gujarat, India

<sup>3</sup>Department of Civil Engineering, Indian Institute of Technology Gandhinagar, Palaj, Gandhinagar, 382055, Gujarat, India

<sup>4</sup>Department of Computer Science Engineering, Indian Institute of Technology Gandhinagar, Palaj, Gandhinagar, 382055, Gujarat, India

<sup>2</sup>Computational Hydrosystems, Helmholtz Center for Environmental Research, UFZ, Leipzig, Germany

\*Correspondence to: rohini.kumar@ufz.de, bhatia.u@iitgn.ac.in

#### **This file includes:**

Supplementary Figures S1 to S7

Supplementary Table 1 to 5

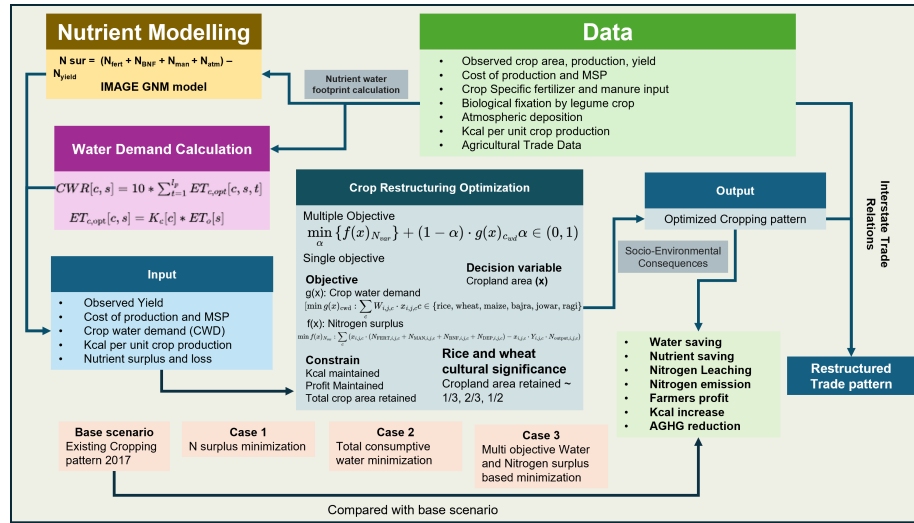

Supplementary Figure 1 – Methodological framework

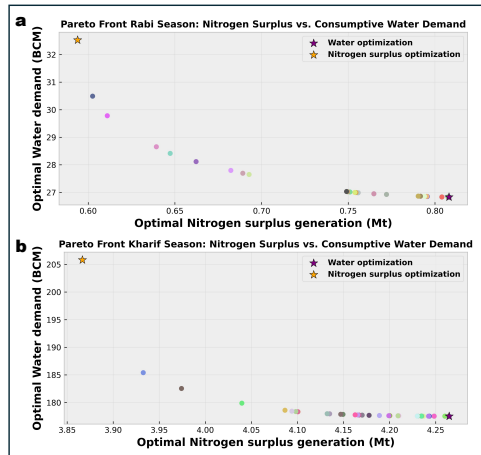

Supplementary Figure 2 – Comparing Water and Nitrogen Perito Curves in Rabi and Kharif Seasons:(a) Rabi Season (b) Kharif Season

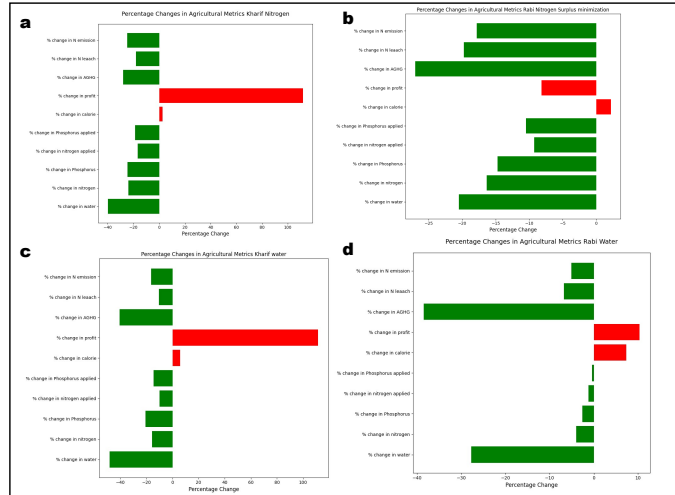

**Supplementary Figure 3 – Analyzing Percentage Change Metrics for Socio-Environmental Tradeoffs:** (a) and (c) depict strategies for nitrogen surplus reduction and water minimization in the Kharif season, while (b) and (d) showcase similar strategies tailored for the Rabi season.



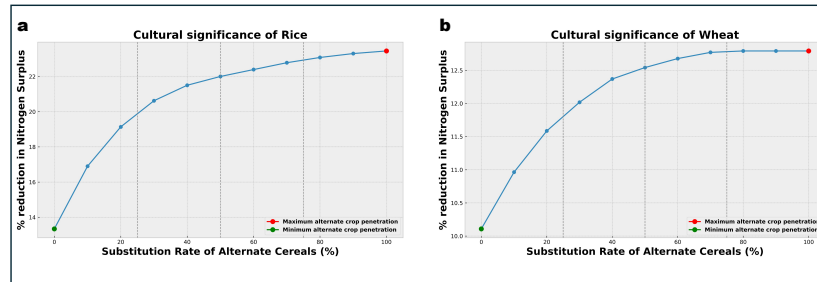

**Supplementary Figure 4 – Exploring the Cultural Significance of Staple Crops in Karif and Rabi Seasons on Nitrogen Surplus Reduction Potential:** (a) highlights the dominance of rice cultivation in the Kharif season, while (b) illustrates the prevalence of wheat cultivation during the Rabi season.

**Supplementary Table 1** – Datasets used in this study

| <b>Data type</b>                           | <b>Source</b>                                          | <b>Resolution</b> | <b>Ref</b> |
|--------------------------------------------|--------------------------------------------------------|-------------------|------------|
| <b>Yield and harvested area</b>            | Ministry of agriculture and farmers welfare DESAGRI[5] | District-level    | [5]        |
| <b>Cost of cultivation</b>                 | Agricultural Statistics at a Glance                    | State-level       | [4]        |
| <b>MSP</b>                                 | Government of India farmers portal                     | India-level       | [7]        |
| <b>Calorie and nutritional content</b>     | National Institute of Nutrition [2]                    | India-level       | [2]        |
| <b>Fertilizer and Manure production</b>    | DESAGRI[6]                                             | Plot-level        | [6]        |
| <b>N atmospheric deposition</b>            | input4MIPS                                             | Gridded           | [1]        |
| <b>Biological Fixation</b>                 | FAOSTAT                                                | District-level    | [10]       |
| <b>N and P Content</b>                     | FAOSTAT                                                | Global            | [10]       |
| <b>Agriculture Greenhouse Gas emission</b> | Carlson et al.[3]                                      | Global            | [3]        |
| <b>Crop water demand</b>                   | Kampman et al.[8]                                      | State-level       | [8]        |
| <b>Agricultural Trade</b>                  | Ministry of Commerce and Industry DGCIS[9]             | State-level       | [9]        |

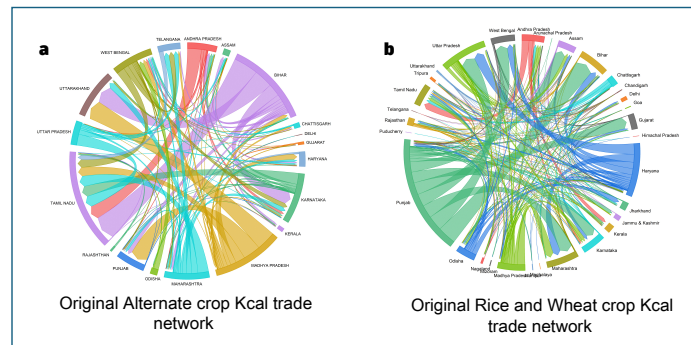

4

**Supplementary Figure 5 – Visualizing the Original Trade Network in Kcal Average Across Three Years (2016-2018):** (a) Chord diagram showing the cumulative average trade volume for maize, ragi, jowar, and bajra from 2016 to 2018. The diagram depicts trade flows with arrows directed towards importing states, where the color of each link corresponds to the exporting state. The width of each link represents the strength of trade. (b) Chord diagram illustrating the combined average trade network for rice and wheat. In this diagram, the link colors indicate the source state, and the link width reflects the strength of trade between states. The diagram provides a comprehensive view of the trade dynamics for these staple crops.

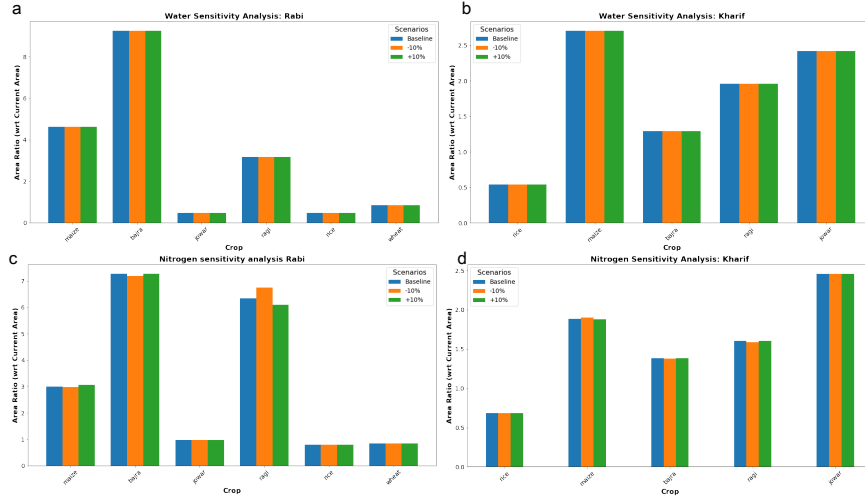

**Supplementary Figure 6 – Post optimization sensitivity analysis:** (a) Optimum Crop area fractions with respect to original cropping area with  $\pm 10\%$  change in water demand data as input to the optimization model for rabi season, (b) Optimum Crop area fractions with respect to original cropping area with  $\pm 10\%$  change in water demand data as input to the optimization model for kharif season, (c) Optimum Crop area fractions with respect to original cropping area with  $\pm 10\%$  change in nitrogen input rate as input to the optimization model for rabi season and (b) Optimum Crop area fractions with respect to original cropping area with  $\pm 10\%$  change in nitrogen input rate as input to the optimization model for kharif season

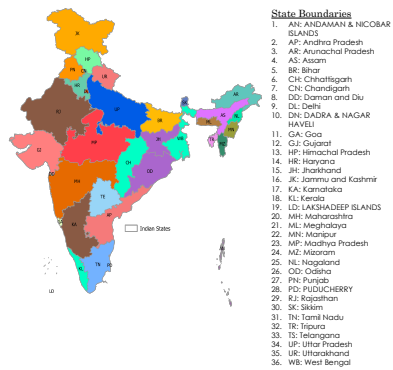

Supplementary Figure 7 – Map represents the state boundaries of India.

**Supplementary Table 2** – Nitrogen and Phosphorous Content of Various Crops

| <b>Crop</b>     | <b>Nitrogen Content</b> | <b>Phosphorous Content</b> |
|-----------------|-------------------------|----------------------------|
| Rice            | 0.0129                  | 0.0028                     |
| Sorghum (Jowar) | 0.0146                  | 0.0045                     |
| Bajra           | 0.0204                  | 0.0042                     |
| Maize           | 0.0124                  | 0.0034                     |
| Ragi            | 0.0204                  | 0.0042                     |

**Supplementary Table 3** – Minimum Support Price (MSP) for Food Grains (Fair Average Quality) in India (2017)

| <b>Crop</b>  | <b>MSP (Rs. per Quintal)</b> |
|--------------|------------------------------|
| Wheat        | 1735                         |
| Paddy (Rice) | 1570                         |
| Jowar        | 1712.5                       |
| Bajra        | 1425                         |
| Maize        | 1425                         |
| Ragi         | 1900                         |

**Supplementary Table 4** – Calorie Content per 100g of Various Crops

| Crop            | Calorie Content (per 100g) |
|-----------------|----------------------------|
| Ragi            | 321                        |
| Bajra           | 348                        |
| Rice            | 356                        |
| Sorghum (Jowar) | 334                        |
| Wheat           | 322                        |
| Maize           | 342                        |

**Supplementary Table 5** – Summary of Reactive Nitrogen Emissions in India for 2015 (USD kg<sup>-1</sup> N) adapted from Sutton, M. A., et al.2017[11]

| Year                    | Health | Ecosystem | Climate |
|-------------------------|--------|-----------|---------|
| Nr to water             | 0.3    | 3.6       | 0.0     |
| NH <sub>3</sub> to air  | 3.6    | 0.6       | 0.0     |
| NO <sub>x</sub> to air  | 5.4    | 0.6       | 0.0     |
| N <sub>2</sub> O to air | 0.6    | 0.0       | 2.7     |



## Supplementary References

- [1] Input Datasets for Model Intercomparison Projects: N Deposition. <https://esgf-node.llnl.gov/search/input4mips/>. Accessed: 04-04-2024.
- [2] RECOMMENDED DIETARY Allowances. Nutrient requirements and recommended dietary allowances for indians. *ICMR-National Institute of Nutrition: Hyderabad, India*, 2009.
- [3] Kimberly M Carlson, James S Gerber, Nathaniel D Mueller, Mario Herero, Graham K MacDonald, Kate A Brauman, Petr Havlik, Christine S O’Connell, Justin A Johnson, Sassan Saatchi, et al. Greenhouse gas emissions intensity of global croplands. *Nature Climate Change*, 7(1):63–68, 2017.
- [4] Government of India. Agricultural statistics at a glance 2017. <https://desagri.gov.in/wp-content/uploads/2021/04/Agricultural-Statistics-at-a-Glance-2017.pdf>, 2017. Accessed: 2024-07-16.
- [5] Government of India. Crops apy report web. <https://data.desagri.gov.in/website/crops-apy-report-web>, 2024. Accessed: 2024-07-16.
- [6] Government of India. Desagri. plot-wise summary data. <https://desagri.gov.in/document-report-category/plot-wise-summary-data/>, 2024. Accessed: 2024-07-16.
- [7] Government of India. Msp statements. <https://farmer.gov.in/mspstatements.aspx>, 2024. Accessed: 2024-07-16.
- [8] Doeke A Kampman, Arjen Ysbert Hoekstra, and Martinus S Krol. The water footprint of india. *Value of Water Research Report Series*, 32:1–152, 2008.
- [9] Ministry of Commerce and Industry. Directorate General of Commercial Intelligence and Statistics. <http://www.dgciskol.gov.in/>, 2021. [Online; accessed 30-September-2022].
- [10] FAO STAT. Food and agriculture organization of the united nations. faostat statistical database, 2019.
- [11] MA Sutton, J Drewer, A Moring, TK Adhya, A Ahmed, A Bhatia, W Brownlie, U Dragosits, SD Ghude, J Hillier, et al. The indian nitrogen challenge in a global perspective. In *The Indian Nitrogen Assessment*, pages 9–28. Elsevier, 2017.
